# Supplementary material for: Ploidy level enhances the photosynthetic capacity of a tetraploid variety of Acer buergerianum Miq
Source: PeerJ. 2021 Dec 16;9:e12620. doi: 10.7717/peerj.12620 (PMC8684723; doi:10.7717/peerj.12620)
Supplement: Supplemental Information 19 — The measurement values of Pn, Gs and Ci of samples X and S in different time periods from May to September. [file peerj-09-12620-s019.xlsx]

## Sheet: Sheet1
Month	Time
		Pn(µmol·m⁻²·s⁻¹)													Gs (mol·m⁻²·s⁻¹)													Ci(µmol·mol⁻¹)													Pn(µmol·m⁻²·s⁻¹)
		X-1				X-2				X-3				Average	X-1				X-2				X-3				Average	X-1				X-2				X-3				Average	S-1				S-2				S-3
		X-1-1	X-1-2	X-1-3	Average-1	X-2-1	X-2-2	X-2-3	Average-2	X-3-1	X-3-2	X-3-3	Average-3		X-1-1	X-1-2	X-1-3	Average-1	X-2-1	X-2-2	X-2-3	Average-2	X-3-1	X-3-2	X-3-3	Average-3		X-1-1	X-1-2	X-1-3	Average-1	X-2-1	X-2-2	X-2-3	Average-2	X-3-1	X-3-2	X-3-3	Average-3		S-1-1	S-1-2	S-1-3	Average-1	S-2-1	S-2-2	S-2-3	Average-2	S-3-1
May	08:00:00	2.4239	2.4271	2.3955	2.4155	2.7362	2.7441	2.722	2.7341	2.7241	2.7135	2.6684	2.702	2.6172	0.0354	0.0375	0.0363	0.0364	0.0214	0.0224	0.0219	0.0219	0.0132	0.0124	0.0128	0.0128	0.0237	282.27	285.24	276.81	281.44	292.91	290.32	294.63	292.62	285.79	298.63	306.46	296.96	290.34	2.3341	2.324	2.3367	2.3316	2.3497	2.3578	2.3422	2.3499	2.3015
	10:00:00	4.0338	4.0672	4.0697	4.0569	4.3217	4.3479	4.339	4.3362	4.0818	4.0978	4.1	4.0932	4.1621	0.0932	0.0914	0.0899	0.0915	0.0852	0.0843	0.0828	0.0841	0.0824	0.0818	0.0794	0.0812	0.0856	244.52	241.91	237.65	241.36	253.99	252.46	249.97	252.14	230.18	229.32	227.65	229.05	240.85	3.6728	3.6589	3.6042	3.6453	3.6738	3.6435	3.6672	3.6615	3.6563
	12:00:00	5.3613	5.3539	5.4479	5.3877	5.4457	5.4431	5.3745	5.4211	5.1543	5.2009	5.1227	5.1593	5.3227	0.1381	0.1363	0.1228	0.1324	0.1187	0.1196	0.1199	0.1194	0.1052	0.1056	0.1066	0.1058	0.1192	238.2	132.09	320.55	230.28	221.78	222.34	220.56	221.56	215.39	216.35	214.7	215.48	222.44	5.0858	5.0794	5.0799	5.0817	5.0928	5.1016	5.0981	5.0975	5.1463
	14:00:00	4.5347	4.5179	4.5221	4.5249	4.6113	4.6028	4.6291	4.6144	4.6731	4.6818	4.6713	4.6754	4.6049	0.0965	0.0959	0.0944	0.0956	0.0985	0.0974	0.0972	0.0977	0.1023	0.1025	0.1036	0.1028	0.0987	224.56	226.61	225.21	225.46	234.89	235.27	234.09	234.75	245.78	245.96	245.69	245.81	235.34	4.2232	4.2259	4.2211	4.2234	4.3653	4.3647	4.3584	4.3628	4.0655
	16:00:00	3.6553	3.6618	3.6785	3.6652	3.8023	3.8047	3.7789	3.7953	3.6769	3.6857	3.6756	3.6794	3.7133	0.0483	0.0456	0.0444	0.0461	0.0531	0.0537	0.0501	0.0523	0.0747	0.0752	0.0733	0.0744	0.0576	312.37	310.12	308.38	310.29	300.95	298.74	299.05	299.58	290.74	289.51	292.21	290.82	300.23	2.5089	2.5028	2.5066	2.5061	2.4371	2.4454	2.4156	2.4327	2.4226
	18:00:00	1.7423	1.7387	1.6985	1.7265	1.6862	1.6855	1.6758	1.6825	2.2761	2.2828	2.2745	2.2778	1.8956	0.0331	0.0326	0.0318	0.0325	0.0323	0.0307	0.0282	0.0304	0.0279	0.0275	0.0277	0.0277	0.0302	310.45	312.05	312.42	311.64	301.56	302.42	303.55	302.51	315.74	314.62	315.21	315.19	309.78	1.7244	1.7215	1.6946	1.7135	1.7018	1.6982	1.7006	1.7002	1.6658
June	08:00:00	3.6218	3.6041	3.6338	3.6199	3.776	3.7835	3.7967	3.7854	3.4748	3.4761	3.4798	3.4769	3.6274	0.03391	0.0364	0.03079	0.0337	0.0334	0.0321	0.0314	0.0323	0.0326	0.0333	0.0322	0.0327	0.0329	344.84	341.19	334.72	340.25	332.89	330.89	334.5	332.76	333.12	332.29	332.18	332.53	335.18	3.2353	3.2316	3.2375	3.2348	3.2395	3.2015	3.1791	3.2067	3.2336
	10:00:00	6.0127	3.0201	9.0044	6.0124	6.0757	6.0544	6.028	6.0527	5.7153	5.6833	5.7302	5.7096	5.9249	0.1214	0.1314	0.1333	0.1287	0.1125	0.1137	0.1134	0.1132	0.1105	0.1114	0.109	0.1103	0.1174	310.28	311.59	309	310.29	301.45	302.68	302.32	302.15	291.57	291.89	291.73	291.73	301.39	5.3139	5.3144	5.3194	5.3159	5.2528	5.2535	5.2629	5.2564	5.2494
	12:00:00	4.6441	4.6522	4.681	4.6591	4.7579	4.7819	4.7189	4.7529	4.2897	4.2902	4.261	4.2803	4.5641	0.107	0.1107	0.1048	0.1075	0.0105	0.099	0.186	0.0985	0.0878	0.0873	0.0862	0.0871	0.0977	265.24	268.18	262.51	265.31	258.98	257.96	259.43	258.79	264.15	263.94	263.64	263.91	262.67	3.0472	3.0437	3.0498	3.0469	3.0112	3.0124	3.0109	3.0115	3.0537
	14:00:00	5.4886	5.5144	5.4559	5.4863	6.0331	6.0347	6.0303	6.0327	6.1243	6.1281	6.1178	6.1234	5.8808	0.1134	0.1094	0.1135	0.1121	0.1089	0.1112	0.1048	0.1083	0.1004	0.0978	0.1027	0.1003	0.1069	272.39	271.58	270.98	271.65	278.35	276.4	272.59	275.78	276.53	277.21	275.55	276.43	274.62	5.1016	5.1075	5.1011	5.1034	5.1227	5.1289	5.1285	5.1267	5.1335
	16:00:00	3.6534	3.6418	3.6413	3.6455	3.5915	3.6172	3.5805	3.5964	3.5133	3.5064	3.4863	3.502	3.5813	0.0554	0.0533	0.0533	0.054	0.0584	0.0573	0.0526	0.0561	0.0517	0.0503	0.0492	0.0504	0.0535	318.59	319.47	323.56	320.54	312.48	313.58	314.89	313.65	303.15	304.02	301.32	302.83	312.34	3.4394	3.4328	3.4445	3.4389	3.4492	3.4512	3.4391	3.4465	3.4588
	18:00:00	2.5494	2.5537	2.5226	2.5419	2.5862	2.5968	2.5795	2.5875	2.1464	2.1474	2.1421	2.1453	2.4249	0.0327	0.0331	0.0317	0.0325	0.0323	0.0318	0.0292	0.0311	0.0312	0.0308	0.0298	0.0306	0.0314	348.68	352.14	345.25	348.69	351.66	351.04	348.71	350.47	357.34	361.04	349.62	356	351.72	2.2048	2.2094	2.196	2.2034	2.2249	2.2242	2.2313	2.2268	2.2399
July	08:00:00	3.7812	3.7706	3.772	3.7746	3.5368	3.5256	3.5258	3.5294	3.8576	3.8564	3.8558	3.8566	3.7202	0.0356	0.0364	0.0315	0.0345	0.0363	0.0368	0.0376	0.0369	0.0414	0.0405	0.0414	0.0411	0.0375	352.93	353.75	356.19	354.29	367.08	366.75	363.81	365.88	345.72	344.21	346.63	345.52	355.23	3.9296	3.9266	3.9203	3.9255	3.9563	3.9467	3.9476	3.9502	3.8921
	10:00:00	7.2129	7.2196	7.2152	7.2159	6.9863	6.9807	6.9892	6.9854	7.7313	7.7362	7.7222	7.7299	7.3104	0.0623	0.0613	0.0597	0.0611	0.0526	0.0533	0.051	0.0523	0.0541	0.0555	0.0533	0.0543	0.0559	304.45	304.87	307.69	305.67	301.48	301.74	298.46	300.56	295.87	296.84	297.96	296.89	301.04	6.5549	6.5457	6.5557	6.5521	6.5436	6.5622	6.5241	6.5433	6.5419
	12:00:00	8.5037	8.5158	8.5012	8.5069	8.6927	8.7127	8.6709	8.6921	8.2484	8.2536	8.2624	8.2548	8.4846	0.1136	0.1142	0.1124	0.1134	0.1046	0.1052	0.1037	0.1045	0.1178	0.1195	0.1197	0.119	0.1123	214.04	212.51	207.53	211.36	211.59	206.82	198.51	205.64	209.47	209.58	207.44	208.83	208.61	7.8454	7.8487	7.8415	7.8452	7.7813	7.7785	7.7805	7.7801	7.8362
	14:00:00	7.6154	7.6219	7.6512	7.6295	7.9167	7.8912	7.878	7.8953	7.0297	7.0255	7.0252	7.0268	7.5172	0.0946	0.0953	0.0936	0.0945	0.1011	0.1036	0.0983	0.101	0.0822	0.0818	0.0802	0.0814	0.0923	223.58	224.58	222.55	223.57	228.41	231.26	232.67	230.78	224.26	223.96	229.12	225.78	226.71	5.6594	5.6527	5.6406	5.6509	5.6252	5.6214	5.6359	5.6275	5.6338
	16:00:00	4.5698	4.5667	4.5528	4.5631	5.0156	5.0223	5.0206	5.0195	4.8248	4.8561	4.8082	4.8297	4.8041	0.0554	0.0561	0.0607	0.0574	0.0619	0.0621	0.0596	0.0612	0.0519	0.0522	0.0522	0.0521	0.0569	225.73	225.66	225.44	225.61	225.63	226.05	228.84	226.84	237.52	236.83	239.47	237.94	230.13	4.1267	4.1224	4.1397	4.1296	4.0229	4.0266	4.0264	4.0253	3.9872
	18:00:00	2.5755	2.5473	2.5515	2.5581	2.7148	2.6977	2.6758	2.6961	2.0203	2.0218	2.0194	2.0205	2.4249	0.0335	0.0332	0.0317	0.0328	0.0248	0.0255	0.0232	0.0245	0.0277	0.0265	0.0241	0.0261	0.0278	275.72	273.68	276.98	275.46	271.32	271.36	271.04	271.24	271.79	273.58	271.98	272.45	273.05	2.6518	2.6552	2.6487	2.6519	2.6248	2.6253	2.6129	2.621	2.6035
August	08:00:00	4.5671	4.5714	4.5658	4.5681	4.2264	4.2322	4.2188	4.2258	3.9123	4.0125	3.795	3.9066	4.2335	0.0762	0.0755	0.0736	0.0751	0.0772	0.0757	0.0799	0.0776	0.0736	0.0723	0.0701	0.072	0.0749	336.62	332.78	340.31	336.57	336.58	337.15	339.34	337.69	331.25	332.04	331.45	331.58	335.28	3.2345	3.2349	3.2344	3.2346	3.2254	3.226	3.2233	3.2249	3.2013
	10:00:00	10.4243	10.5318	10.6171	10.5244	11.3338	11.342	11.376	11.3506	11.6234	11.5842	11.5516	11.5864	11.1538	0.1758	0.1788	0.1806	0.1784	0.0219	0.0225	0.0201	0.0215	0.3713	0.3705	0.3685	0.3701	0.19	285.59	284.93	285.89	285.47	286.56	287.72	284.89	286.39	281.59	280.91	283.23	281.91	284.59	8.5271	8.5275	8.5261	8.5269	8.5686	8.5644	8.5611	8.5647	8.5839
	12:00:00	9.0648	9.0603	9.0291	9.0514	8.9216	9.0151	8.9682	8.9683	5.1021	5.0958	5.0745	5.0908	7.7035	0.1641	0.1652	0.1612	0.1635	0.01588	0.1585	0.30022	0.1582	0.1362	0.1368	0.1371	0.1367	0.1528	229.33	228.7	227.89	228.64	232.88	231.79	230.07	231.58	230.25	231.63	233.49	231.79	230.67	6.7166	6.7138	6.7152	6.7152	6.7349	6.7464	6.7141	6.7318	6.7154
	14:00:00	9.5536	0.5633	18.5412	9.5527	9.0803	9.0584	9.02	9.0529	8.9058	8.9156	8.8945	8.9053	9.1703	0.1701	0.1678	0.1715	0.1698	0.1705	0.1718	0.1725	0.1716	0.1688	0.1689	0.1681	0.1686	0.17	221.79	220.26	219.09	220.38	215.69	213.96	217.63	215.76	215.69	216.15	216.79	216.21	217.45	7.7881	7.7846	7.7955	7.7894	7.8046	7.798	7.816	7.8062	7.8856
	16:00:00	4.5948	4.5862	4.5629	4.5813	4.9479	4.9654	5.0042	4.9725	5.0852	5.0813	5.0786	5.0817	4.8785	0.1487	0.1486	0.1461	0.1478	0.1526	0.1517	0.1505	0.1516	0.1485	0.1483	0.1478	0.1482	0.1492	271.76	272.52	270.4	271.56	278.56	277.48	275.98	277.34	295.44	296.17	296.27	295.96	281.62	5.1335	5.1363	5.1382	5.136	5.1236	5.1318	5.119	5.1248	5.0842
	18:00:00	2.7606	2.7654	2.7855	2.7705	2.6144	2.6291	2.5937	2.6124	2.5173	2.5237	2.528	2.523	2.6353	0.0988	0.0976	0.0991	0.0985	0.1258	0.1289	0.1254	0.1267	0.0618	0.0608	0.0622	0.0616	0.0956	315.18	317.24	313.81	315.41	324.32	325.33	323.1	324.25	326.57	327.11	324.62	326.1	321.92	2.8521	2.8417	2.8703	2.8547	2.8865	2.8794	2.8933	2.8864	2.9688
September	08:00:00	3.5292	3.518	3.5272	3.5248	3.6584	3.6438	3.7324	3.6782	4.0902	4.0857	4.092	4.0893	3.7641	0.0649	0.0662	0.0624	0.0645	0.0512	0.0522	0.0514	0.0516	0.0414	0.0412	0.0398	0.0408	0.0523	321.92	321.33	318.61	320.62	301.76	302.11	300.84	301.57	314.54	313.38	308.56	312.16	311.45	3.1262	3.1363	3.117	3.1265	3.0131	3.0142	3.0225	3.0166	2.9423
	10:00:00	7.5517	7.5489	7.538	7.5462	7.3495	7.3356	7.3205	7.3352	7.0486	7.0514	7.0494	7.0498	7.3104	0.1127	0.1135	0.1116	0.1126	0.1223	0.1215	0.1219	0.1219	0.1065	0.1059	0.1065	0.1063	0.1136	268.75	269.41	267.49	268.55	272.78	273.91	270.39	272.36	270.49	270.52	270.31	270.44	270.45	7.1677	7.1527	7.1701	7.1635	7.0259	7.0268	7.0364	7.0297	7.1536
	12:00:00	9.3547	9.3598	9.3538	9.3561	9.2289	9.2305	9.2261	9.2285	8.9432	8.9347	8.901	8.9263	9.1703	0.1535	0.1541	0.1496	0.1524	0.1427	0.1432	0.1416	0.1425	0.1396	0.1385	0.1404	0.1395	0.1448	214.21	215.18	213.57	214.32	212.54	212.93	212.87	212.78	210.63	210.55	210.56	210.58	212.56	8.4694	8.4597	8.4683	8.4658	8.5273	8.5249	8.5261	8.5261	8.5391
	14:00:00	5.9838	5.9441	5.9782	5.9687	6.5581	6.5643	6.5348	6.5524	7.2218	7.2378	7.2043	7.2213	6.5808	0.1248	0.1238	0.1249	0.1245	0.1237	0.1229	0.1203	0.1223	0.1334	0.1235	0.1124	0.1231	0.1233	241.85	241.76	242.15	241.92	239.62	240.74	238.35	239.57	236.75	236.73	236.74	236.74	239.41	4.5677	4.5628	4.5777	4.5694	4.7017	4.7043	4.7003	4.7021	4.6769
	16:00:00	3.1623	3.1596	3.1548	3.1589	3.3845	3.3653	3.3476	3.3658	3.2773	3.2633	3.2622	3.2676	3.2641	0.0634	0.0637	0.0592	0.0621	0.0532	0.052	0.0529	0.0527	0.0604	0.0612	0.0587	0.0601	0.0583	291.84	289.93	290.15	290.64	287.56	289.31	287.88	288.25	275.45	275.36	275.9	275.57	284.82	3.6154	3.6148	3.6172	3.6158	3.6439	3.6378	3.6539	3.6452	3.6396
	18:00:00	3.0169	2.0024	0.9852	2.0015	2.0414	2.0567	2.0786	2.0589	1.7149	1.7234	1.7289	1.7224	1.9276	0.0338	0.0321	0.0316	0.0325	0.0382	0.0384	0.0371	0.0379	0.0372	0.0367	0.0371	0.037	0.0358	326.45	325.74	324.79	325.66	331.24	330.38	328.59	330.07	313.11	313.94	317.35	314.8	323.51	1.8498	1.8438	1.8402	1.8446	1.8256	1.8248	1.8237	1.8247	1.8373
[truncated: 30 more columns]
