# Supplementary material for: Ploidy level enhances the photosynthetic capacity of a tetraploid variety of Acer buergerianum Miq
Source: PeerJ. 2021 Dec 16;9:e12620. doi: 10.7717/peerj.12620 (PMC8684723; doi:10.7717/peerj.12620)
Supplement: Supplemental Information 20 — The measured value and average value of chlorophyll a, chlorophyll b, total chlorophyll content; the measured value of chlorophyll fluorescence and the average value of Fv/Fo and Fv/Fm. [file peerj-09-12620-s020.xlsx]

## Sheet: Sheet1
			665(nm)	649(nm)	470(nm)		Chla concentration	Chlb concentration		Chl(a+b)concentration		Chl(a+b) contents（mg/g）		Chla contents（mg/g）	Chlb contents（mg/g）		Chla contents mean	Chlb contents mean	Chl(a+b) contents mean			Fo	Fm	Fv/Fo	Fv/Fm	Fv/Fo mean	Fv/Fm mean
S	S-1	S-1	0.8754	0.3743	0.9475		9.63665	2.9346		12.5712		1.57141		1.20458	0.366825		1.16615	0.351025	1.51717			36	146	3.05556	0.753425	3.45036	0.77455
		S-2	0.8845	0.3831	0.9811		9.70305	3.08764		12.7907		1.59884		1.21288	0.385954	SE	0.0520217	0.0340142	0.0750228			42	186	3.42857	0.774194	0.013129	0.013129
		S-3	0.7542	0.3229	0.8208		8.29954	2.53884		10.8384		1.3548		1.03744	0.317355							41	184	3.4878	0.777174
	S-2	S-4	0.8316	0.3577	0.9085		9.13984	2.84088		11.9807		1.49759		1.14248	0.35511							44	204	3.63636	0.784314
		S-5	0.8725	0.3731	0.9439		9.60445	2.92588		12.5303		1.56629		1.20056	0.365735							41	197	3.80488	0.791878
		S-6	0.8806	0.3819	0.9746		9.6569	3.08623		12.7431		1.59289		1.20711	0.385779							40	165	3.125	0.757576
	S-3	S-7	0.8313	0.3574	0.9079		9.13772	2.83559		11.9733		1.49666		1.14222	0.354448							42	176	3.19048	0.761364
		S-8	0.8546	0.3649	0.8879		9.41116	2.85223		12.2634		1.53292		1.17639	0.356529							45	210	3.66667	0.785714
		S-9	0.8357	0.3321	0.9512		9.37317	2.17189		11.5451		1.44313		1.17165	0.271487							38	177	3.65789	0.785311
X	X-1	X-1	1.2114	0.5105	1.2595		13.3868	3.87463		17.2614		2.15768		1.67335	0.484329		1.85171	0.621526	2.47323							5.0078	0.833328
		X-2	1.4136	0.6339	1.4546		15.3585	5.47459		20.8331		2.60413		1.91981	0.684324	SE	0.133135	0.0993926	0.23192			45	289	5.42222	0.844291	0.00599587	0.00599587
		X-3	1.4134	0.636	1.4571		15.3413	5.52847		20.8697		2.60872		1.91766	0.691059							51	306	5	0.833333
	X-2	X-4	1.2107	0.5106	1.2596		13.3763	3.88225		17.2586		2.15732		1.67204	0.485281							49	287	4.85714	0.829268
		X-5	1.2126	0.5105	1.2595		13.4035	3.86585		17.2694		2.15867		1.67544	0.483231							43	254	4.90698	0.830709
		X-6	1.4183	0.6372	1.4606		15.4013	5.52256		20.9239		2.61549		1.92517	0.690319							44	259	4.88636	0.830116
	X-3	X-7	1.5166	0.6827	1.5516		16.4596	5.93868		22.3983		2.79978		2.05745	0.742335							47	277	4.89362	0.830325
		X-8	1.4159	0.6325	1.4482		15.4002	5.42281		20.823		2.60288		1.92503	0.677852							45	286	5.35556	0.842657
		X-9	1.3945	0.6189	1.4365		15.1952	5.24		20.4352		2.55441		1.89941	0.655							50	302	5.04	0.834437
																						48	274	4.70833	0.824818
