# Supplementary material for: Ploidy level enhances the photosynthetic capacity of a tetraploid variety of Acer buergerianum Miq
Source: PeerJ. 2021 Dec 16;9:e12620. doi: 10.7717/peerj.12620 (PMC8684723; doi:10.7717/peerj.12620)
Supplement: Supplemental Information 22 — The results were used to verify the expression of candidate genes. [file peerj-09-12620-s022.xlsx]

## Sheet: Sheet1
Target	Gene ID	Sample	Ctrl	Relative Quantity	Relative Quantity SD	Corrected Relative Quantity SD	Relative Quantity SEM	Corrected Relative Quantity SEM	Unscaled Expression	Unscaled Expression SD	Corrected Unscaled Expression SD	Unscaled Expression SEM	Corrected Unscaled Expression SEM	Expression	Expression SD	Corrected Expression SD	Expression SEM	Corrected Expression SEM	Wells	Mean Cq	Cq SD	Cq SEM
37424-1	CL6641.Contig2_All	S		0.203394	0.0305246	0.0305246	0.0176234	0.0176234	0.239915	0.039468	0.039468	0.0227868	0.0227868	0.239915	0.039468	0.039468	0.0227868	0.0227868	3	25.3692	0.216514	0.125005
37424-1	CL6641.Contig2_All	X		1	0.246888	0.246888	0.142541	0.142541	1	0.258899	0.258899	0.149475	0.149475	1	0.258899	0.258899	0.149475	0.149475	3	23.0715	0.356183	0.205643
40148-1	CL7423.Contig2_All	S		1	0.241176	0.241176	0.139243	0.139243	1.17956	0.295374	0.295374	0.170534	0.170534	1.17956	0.295374	0.295374	0.170534	0.170534	3	21.6761	0.347943	0.200885
40148-1	CL7423.Contig2_All	X		0.984692	0.170197	0.170197	0.0982634	0.0982634	0.984692	0.186702	0.186702	0.107792	0.107792	0.984692	0.186702	0.186702	0.107792	0.107792	3	21.6984	0.24936	0.143968
48146-1	Unigene5873_All	S		1	0.0810587	0.0810587	0.0467993	0.0467993	1.17956	0.124333	0.124333	0.0717837	0.0717837	1.17956	0.124333	0.124333	0.0717837	0.0717837	3	22.1609	0.116943	0.0675171
48146-1	Unigene5873_All	X		0.449852	0.073844	0.073844	0.0522156	0.0522156	0.449852	0.0817456	0.0817456	0.0578029	0.0578029	0.449852	0.0817456	0.0817456	0.0578029	0.0578029	2	23.3134	0.236821	0.167458
TUB		S		0.847776	0.0571229	0.0571229	0.040392	0.040392											2	22.3603	0.0972083	0.0687367
TUB		X		1	0.0779432	0.0779432	0.0450005	0.0450005											3	22.1221	0.112448	0.0649221
12456-1	CL1401.Contig2_All	S		1	0.335882	0.335882	0.237504	0.237504	1.49601	0.596801	0.596801	0.422002	0.422002	1.49601	0.596801	0.596801	0.422002	0.422002	2	24.6477	0.484575	0.342646
12456-1	CL1401.Contig2_All	X		0.151112	0.0504651	0.0504651	0.0356842	0.0356842	0.151112	0.0569926	0.0569926	0.0402999	0.0402999	0.151112	0.0569926	0.0569926	0.0402999	0.0402999	2	27.374	0.4818	0.340684
18314-1	CL2285.Contig2_All	S		0.273094	0.0330283	0.0330283	0.0190689	0.0190689	0.408552	0.100867	0.100867	0.0582353	0.0582353	0.408552	0.100867	0.100867	0.0582353	0.0582353	3	19.0113	0.174481	0.100737
18314-1	CL2285.Contig2_All	X		1	0.0619984	0.0619984	0.0438395	0.0438395	1	0.185908	0.185908	0.131457	0.131457	1	0.185908	0.185908	0.131457	0.131457	2	17.1388	0.0894448	0.063247
24080-1	CL3396.Contig3_All	S		0.375818	0.16563	0.16563	0.117118	0.117118	0.562229	0.275756	0.275756	0.194989	0.194989	0.562229	0.275756	0.275756	0.194989	0.194989	2	18.472	0.635823	0.449595
24080-1	CL3396.Contig3_All	X		1	0.0454432	0.0454432	0.0262366	0.0262366	1	0.181061	0.181061	0.104536	0.104536	1	0.181061	0.181061	0.104536	0.104536	3	17.0601	0.0655607	0.0378515
36095-1	CL6251.Contig1_All	S		1	0.299662	0.299662	0.211893	0.211893	1.49601	0.551954	0.551954	0.39029	0.39029	1.49601	0.551954	0.551954	0.39029	0.39029	2	23.0328	0.432321	0.305697
36095-1	CL6251.Contig1_All	X		0.270634	0.0355182	0.0355182	0.0251152	0.0251152	0.270634	0.0592571	0.0592571	0.0419011	0.0419011	0.270634	0.0592571	0.0592571	0.0419011	0.0419011	2	24.9184	0.189341	0.133884
3675-1	CL335.Contig5_All	S		0.0653681	0.0160861	0.0160861	0.0113746	0.0113746	0.0977916	0.0319712	0.0319712	0.022607	0.022607	0.0977916	0.0319712	0.0319712	0.022607	0.022607	2	24.3037	0.355025	0.25104
3675-1	CL335.Contig5_All	X		1	0.21045	0.21045	0.121504	0.121504	1	0.273875	0.273875	0.158122	0.158122	1	0.273875	0.273875	0.158122	0.158122	3	20.3684	0.303616	0.175293
TUB		S		0.668444	0.143874	0.143874	0.0830654	0.0830654											3	21.7536	0.310521	0.179279
TUB		X		1	0.175265	0.175265	0.101189	0.101189											3	21.1725	0.252854	0.145986
34517-1	CL5835.Contig1_All	S		1	0.119101	0.119101	0.068763	0.068763	1.8989	0.315983	0.315983	0.182433	0.182433	1.8989	0.315983	0.315983	0.182433	0.182433	3	26.1056	0.171826	0.099204
34517-1	CL5835.Contig1_All	X		0.599617	0.137736	0.137736	0.097394	0.097394	0.599617	0.18337	0.18337	0.129662	0.129662	0.599617	0.18337	0.18337	0.129662	0.129662	2	26.8435	0.331397	0.234333
TUB		S		0.526622	0.0611995	0.0611995	0.0353336	0.0353336											3	23.6684	0.167658	0.0967973
TUB		X		1	0.20188	0.20188	0.116555	0.116555											3	22.7432	0.291251	0.168154
