# Supplementary material for: Ploidy level enhances the photosynthetic capacity of a tetraploid variety of Acer buergerianum Miq
Source: PeerJ. 2021 Dec 16;9:e12620. doi: 10.7717/peerj.12620 (PMC8684723; doi:10.7717/peerj.12620)
Supplement: Supplemental Information 23 [file peerj-09-12620-s023.xlsx]

## Sheet: Sheet1
order	The sample name	Serial number	Pipe number	concentration(ng/ μL)	volume(μL)	Total amount(μg)	OD260/ 280	OD260/ 230	RIN	28S/ 18S
1	X1	WH1809006609	1	2880	11	31.68	2.05	2.11	9.9	2.6
2	X2	WH1809006610	1	1917	12.5	23.96	2.09	2.08	9.7	3
3	X3	WH1809006611	1	1757	14	24.6	2.09	2.11	9.7	2.7
4	S1	WH1809006612	1	1175	14.5	17.04	2.05	2	9.5	2.7
5	S2	WH1809006613	1	738	14.5	10.7	1.92	1.72	9.5	2.3
6	S3	WH1809006614	1	1960	10	19.6	2.05	2.02	9.9	2.3
